# Supplementary material for: Genome-Wide Comparative Analysis of the Fasciclin-like Arabinogalactan Proteins (FLAs) in Salicacea and Identification of Secondary Tissue Development-Related Genes
Source: MDPI journal article supplement (doi:10.3390/ijms24021481), 2023-01-12
Supplement: s1 [file s1]

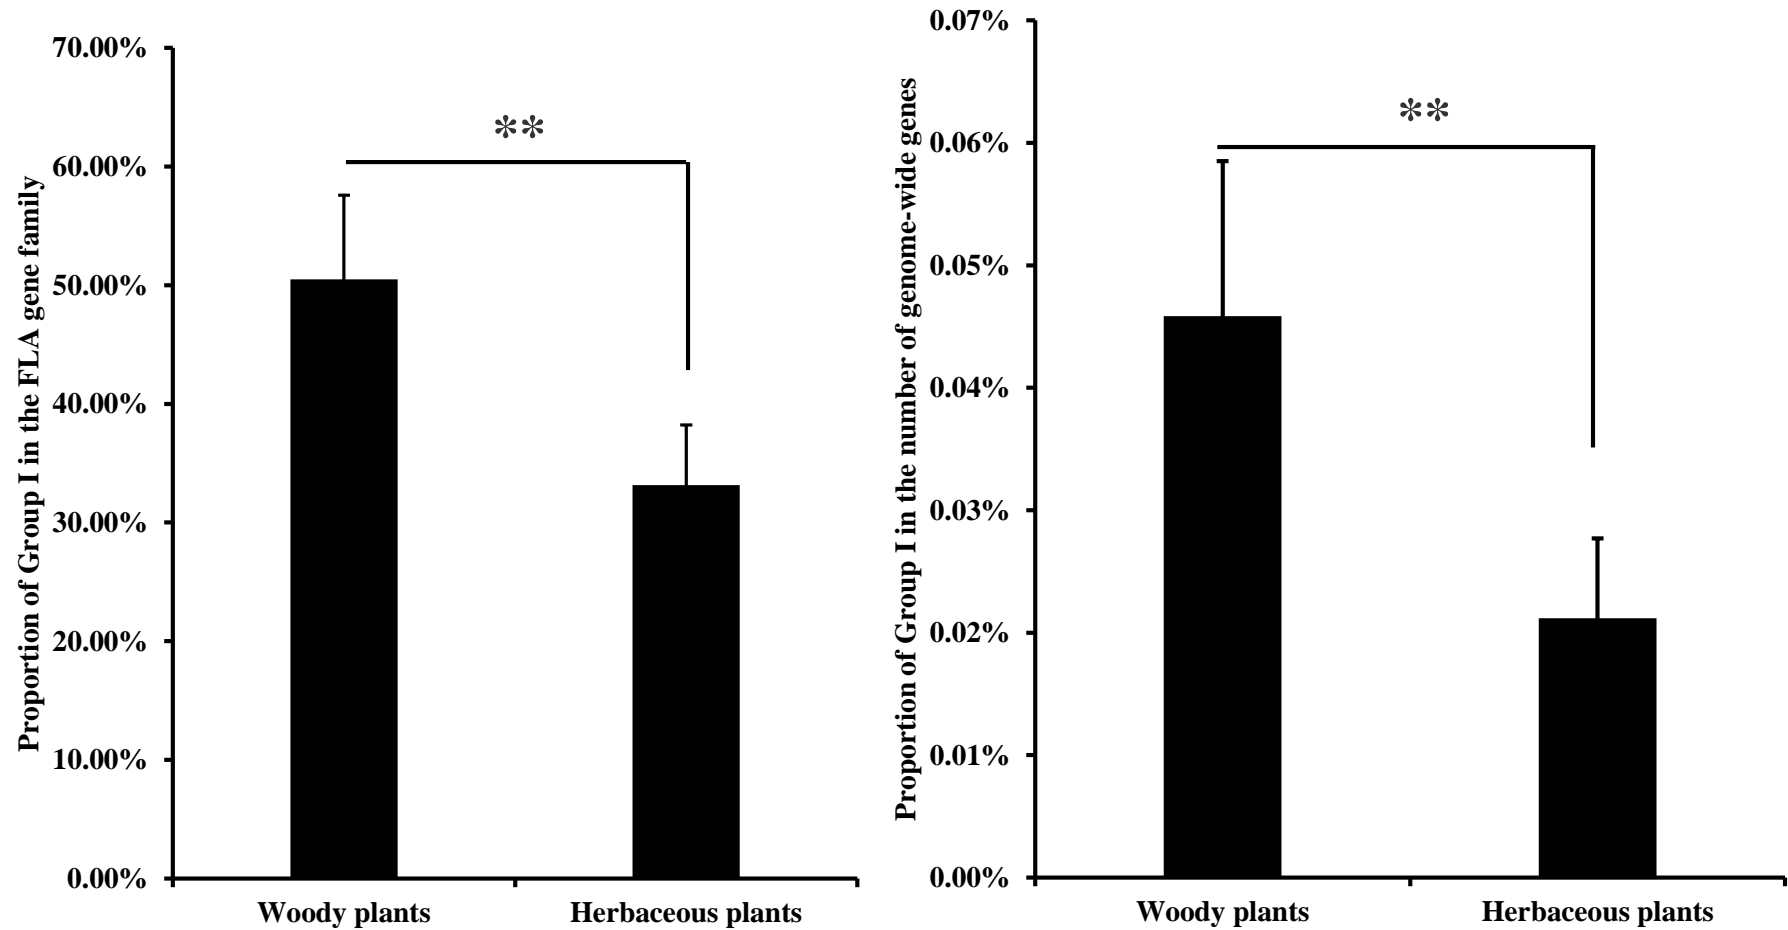

**Supplementary Figure S1.** Significant ANOVA for the proportion of Group I gene occupancy in woody and herbaceous plants. (A) Proportion of Group I genes in the FLA gene family. (B) Proportion of Group I genes at the genome-wide level. Values shown are the means  $\pm$  SD of the five woody and herbaceous occupancies, respectively (\*\* $P < 0.01$ , two-sided Student's  $t$  test). The raw data for statistical analysis are in Supplemental Table S8.
