# Supplementary material for: Genome-Wide Comparative Analysis of the Fasciclin-like Arabinogalactan Proteins (FLAs) in Salicacea and Identification of Secondary Tissue Development-Related Genes
Source: MDPI journal article supplement (doi:10.3390/ijms24021481), 2023-01-12
Supplement: s1 [file s1]

**Supplemental Table S1.** Prediction of conserved structural domains of FLA proteins in *P. deltoids*.

| Name    | Precursor protein backbones                                                                                                                                                                                                                                                                                                                                                                                                                                             |
|---------|-------------------------------------------------------------------------------------------------------------------------------------------------------------------------------------------------------------------------------------------------------------------------------------------------------------------------------------------------------------------------------------------------------------------------------------------------------------------------|
| PdeFLA1 | MSLKSSSLFALCFSSFLFNTVRA SNITQILSQY PDFSTFSSYLTQTQLAGEINS<br>RQTITVLVVENGNMSPLSGKPNGEIKNVLSGHVILDYYDVAKLQKLQNKTA<br>MLTTLFQSSGQAKGQQGFLNVTVLGANSVAFGSAVPGSSLSSNLVKS SVSSQP<br>YNISVLQVSNIIVPAGTGNTNSTT SPVPVGPPKT SPTTAS SPNKPPSTSNPPRP<br>SPTTADGPAAD SPAPSPFAMDGPAA TPAAADGSLAD APSDLKSDASVINTGNN<br>LALLALILLSAFVLA                                                                                                                                                   |
| PdeFLA2 | MERLQHLLISLYLLLSINLTTITA Q SPAPAPAPP GPTN LGNTNNGLTILAPSDSA<br>FSALKTGTLRTLTDQEKVELMQFHIVPMFISSSQFDTVSSPLKTHAGSGARFQ<br>LNV TASGNSLNISTGLTNTTISDTVYTDTHLAIYQVDK VLLPLDIF TP KPPPPA<br>PAPAP KLKEESE SPDDAVSKKDISSAVSFVMHHD TVFFIVGT VVAISFSL                                                                                                                                                                                                                            |
| PdeFLA3 | MQLTVLLSLLFLLSTATTITYG HNITSILQHPSLSTFNHYLTLTHLAGEINRRT<br>TITVCVVDNAAMSEILSKKPSISTIKNILSLHVLLDYFGTKKLHQIRDGTALAA<br>TMFQATGS AP GSTGFVNITDVKGGKVAFGPKDNGGNLDVFYVKSVEEIPYNI<br>SVIQISKLLPSDVAA APTPEPSAMNITDIMS AHGCKVFADTLIANPDA SKTYQ<br>DTIDGGLTVFCPLDDPFKAFLPKFKNLTASGKESLLQFFGVPVYQSLAMLKS<br>NNGIMNTLATNGDKKFDFTVQNDGEDVTLKTRGTTAKIVGTLIDEQPLAIYS<br>IDK VLLP KELFKAAL TPAPAPAPEEAAAD AP KSSKHKKPSADD AP SD SPAD SPD<br>GDAADQTADDNASVRLDGGRLVAMVLSLCLGLLML       |
| PdeFLA4 | MAKYLFSSLLLLLTTTATS TFNPICTF SPTPSP TSAT TPAPTP ITNTNTNIAL SP<br>TF APSPIITIP TPAPSSAPTP INNTTTTTL TPTT TPST APTP IPTNKITL TPTF APSL A<br>PTPTII TPILGP SPAPTP ISSSTFTT TPTFDP SPAPTP TNSSIFTATFSSLPP TPTSTFI<br>PQQDDLKFVFQEIQIYNIIDAILGTGDFK N WANALSMADSTTFPISATFFIPSDN<br>SLSPITTSADPDIFPYHIVPQRLSFADLQQFKTFSRLPTLLFDKSILITNNSASHF<br>TLDGSRLTHPDIYTNAAITVHGIDNLL DHSVYGTESGKNSSKPD AVGPPP TPA<br>SPPRPT TPRTFVPSTADDEEFTVHQHGESDAACLCTEVWTVFLVLCVALASKF<br>QRMILVH |
| PdeFLA5 | MMGLCSICSKAA SPPAPTPTP SS SPAPAPAPTTP YKPSLSNLTQDQVKQLILFH<br>ALPHYALADFKNLSQVSPVSTFAGAGGYALNFTDVSGTVHLDSGWSKTKV<br>SSSVHSTDPVAVYQVDKVL FLRRYLVL IYP SPAPAPAP ETSLAAD SP SSDSTGD<br>GSAPGTSLQILLIGSLV                                                                                                                                                                                                                                                                   |
| PdeFLA6 | MEFSMIIMFSSTLVFLCTPVAYA QTAA TPAPAPTTP SS SPAPAPAPTTP YVSLTDL<br>LSVAGPFHTFLSYLESTKVVDTFQNQANNTDEGITIFKPSLSNLTQDQVKQLI<br>LFHALPHYALADFKNLSQVSPVSTFAGAGGYALNFTDVSGTVHLDSGWSK<br>TKVSSSVHSTDPVAVYQVDK VLLP EAIFGADIPP APAPAPAP ETSLAAD SP SSD<br>STGDGS APGT SPPNSSYRIFGVDVWSQLVLALIGVLVFL                                                                                                                                                                               |
| PdeFLA7 | MISILAQERLLGAALGAAGFIVYEQRKRIYQSI SEHPQSQLREPIFGKQFR<br>SEFELSWNKAVDQTFGPLVASLNSRQ SPAA APVMPPPT TPVK APPT APSQAPS<br>AQVAT SPGPVDVIKILQKAGH FTVFVRLMQATTEDTELNKELNKTNNGITIFA<br>PSDSAFSSLKAGFLNALSDCKTELVKFHVLPALISSSQFQTVSNPVRTQAGT                                                                                                                                                                                                                                   |

|          |                                                                                                                                                                                                                                                                                                                                                                                                                                                                                                                       |
|----------|-----------------------------------------------------------------------------------------------------------------------------------------------------------------------------------------------------------------------------------------------------------------------------------------------------------------------------------------------------------------------------------------------------------------------------------------------------------------------------------------------------------------------|
|          | GPRVTLNVTTTGNFVNITTGLTNTSISGTVYTDSQLAIYQIDKVLFPDLDFTPK<br>PPAPAPAPELGKPRKAAPGVESTAPKDN SGALTPLILHDNALLAVSCMVAA<br>IFS                                                                                                                                                                                                                                                                                                                                                                                                 |
| PdeFLA8  | MESSPKLSILLILSLSIISSTSIDGVETTTFSNLSPQSPQPQISTSDHFHDHSFSS<br>HTNLLAPILSHLGFTQLAMAVPSLPADSTTTAWSGPSTLFAPSDSSLRTCFS<br>IPDLLHEHIVPGLFSIDYLRKLAFGTKIETLSPGR CITVTSTSLKND SATPSTVK<br>VFIGGVEITHPDLFNNGVLIHGIIRGYIAPLSPFSCDFERLSSLSPFQEGVTPH<br>VTSTTHQQGIGTLVQPAIMRLMLRDAMLRLRSNGFTILSLAMRVKYPELTNL<br>VNMTVFALDDVSIFSGSHGYISSVRFHIVPNHYLSTADLERLPVGATLPTLER<br>GQALVVT SAGGLTG FNTAVPMRINYVRVKVPDVMRNLKIVVHAVYLPFPRIH<br>PTSAAAFDEMMGIGGEGQNIVAAEDAACSAVFEEDGSCGMVPPMPAQVKPS<br>VVVRSDEDDHGL                             |
| PdeFLA9  | MRKQLLSPFVPFLMFFLYSSTTVAQTPSPAPSGPTNITAILEKAGQFTTLIRLM<br>KSTQEADQINTQLNNSNQGLTVFAPPDNAFTNLKAGTLNSLSDQKQVQLVQ<br>FHIIPNFFSMSSFQTVSNPLRTQAGNSADGEFPLNVTTSGNQVNITTGVNTAT<br>VANTIFTDGQLVVYQVDQVLLPLDLFGTAAAPAPAPSKPKDKVPAKAPAGSK<br>ADASVDSES KGVDEEM                                                                                                                                                                                                                                                                   |
| PdeFLA10 | MARINPAISQITPTTLTYFLLLLTTTTITPILAITNL TALLSSFPDFSSFTSLL<br>ASTPSITSDLSNRSALTLLVIPNSYLSSSDLTRRLSPSSLTDLLRYHILLQYLSS<br>SDLHQLPPAGALITTLFQTTGRASSNFGSVNITRNPVTNAITISSPSPFSSSNAT<br>VLSLIKTL PYNVSIISVNSLLVPYGF DLMASETRPSLGLNITKALLDGRSFFVA<br>ASLLSASGVVQEFEADEGGAGITLFVPTDSAFSDLSETDVSLQSLPADKKAD<br>VLKFHVLHSYYPLGSLESIVNPVQPTLATEDMGAGSFTLNISRANGSVAIDSG<br>IVLASVTQTVFDQNPVAIFGVSKVLLPKEIFGRNPVLT SKPGNSDMGNALPPA<br>VALSPESSPKMLSSAPGVREENSGVGG LQRFSTLPLLCALVVWYCI                                               |
| PdeFLA11 | MDSHICGVSKTFLFLTLCLSVSSISALPHQNK TGNSTGTGQMINSNSVLVA<br>LLDSHYTELAELVEKALLLQTLEEAVGKHNITIFAPRNEALERQLDPEFKRFL<br>LEPGNLKSLQTLVLFHIIPQRVGSNDWPGHKSNSPRHTTLCNDHLHLITKNSG<br>KKVVGSAELTRPDDVTRPDGVIHGIEQLLVPQSVQEDFNRRRNLR SISAVLPE<br>GAPFVDPRTHRLKKPEPPVRAGSPFVLPIYDAMAPGPSLAPAPAPGPGGPHH<br>HFDGESQVKDFIQTL LLYGGYNEMADILVNLTSLATEMGR LVSEGYVLTVLA<br>PNDEAMAKLT TDQLSEPGAPEQIIYYHIPEYQTEESMYNAVRRFGKIGYDTL<br>RLPHKVAAQEADGSVKFGSGDGSAYLFDPIYTDGRISVQGIDGVLPPEVEK<br>ESTSVKKSVS AVKVATTKPRRGKLMEVACIMLGT LGQDSRFTTCQ |
| PdeFLA12 | MIHQYCHCYCWLKTL SNYRKLSTLLFIPYITRPHILICRLRNSFSTMNSPSTYF<br>WSTSLHAYKGLCIISFEFKHKGSDNNNKEGFGFIFLAKMDSKASSLLFIAFLC<br>LISTSTAFNITKILAQYPEFANFNDLLSQSGLAQEMNSRQTITVLVLDNGSIDG<br>LSGRPLDI AKRILSAHVILDYYDQIKLSKLQKASTIVTTLYQASGVADNRQGF<br>LNISRTAEGIKFGS AMKGAPLVASLVKSIYSQPYNISVLQVSEPIETPGIENMAP<br>PPPPGTAAVPKKAPAPAPSTKTPPAAPPTAKTPAKSPAKSPSKAPAPSKEGPSTP<br>TEAPAEGPVAADGPVAAGGPVADV PADSPADTEVAEEAPAVAPAKAASSRM<br>HVAGATVVIGLFACIMGF                                                                             |
| PdeFLA13 | MAPSPPCIHIF FASILL SNFHLGFS SSSSSSTLQENHSNGSYSGQINSNSVLVA<br>LLDSHYTELAELVEKALLLQTLEDAVGKHNITIFAPRNEALERDL DPEFKRIN                                                                                                                                                                                                                                                                                                                                                                                                   |

|          |                                                                                                                                                                                                                                                                                                                                                                                                                                                                                                                       |
|----------|-----------------------------------------------------------------------------------------------------------------------------------------------------------------------------------------------------------------------------------------------------------------------------------------------------------------------------------------------------------------------------------------------------------------------------------------------------------------------------------------------------------------------|
|          | <p>LSHNSSLHHHSTLCRDRIKLSQSSEKGLIDSAKIIQVNAVERPDGVIHGIERLL<br/>IPRSVQQDFNNRRSLQSIASVKPEGAPAEVDPRTHRLKKPAPPAPKPGSAPVLP<br/>DIYDAMAPGPSLAPAPAPGPGGPHHHFNGERQVKDFIETLLLYGGYNEMADILV<br/>NLTSLATEMGRVLVSEGYVLTVLAPNDEAMAKLTDDQLSEPGAPEQIIYYHVIP<br/>EYQTEESMYNAVRRFGKISYDTLRLPHKVLAQEADGSVKFGHAENSAYLFD<br/>PDIYTDGRISVQGIDGVLPLEEKEKSDTKTEMKSVKVAAPQRRGKLLEVA<br/>CRMLGTFGQDSHFTTCQ</p>                                                                                                                                   |
| PdeFLA14 | <p>MYFFYSVQHRPHLCPTMQPFILLFWLLFLHTCSQTFCQSPAQSPAATQTKAP<br/>VSPPPAGPTDTIQILLKAGRFLSFVRLMKATHVDTQLFSQLNSSTDGITMFAP<br/>NDNAFTSLVAGAVGSLNDREKLEFVQFHILPRFLSISDFQTLNPNVKTLAGSD<br/>RKFPILTITSDNSVTVSSGLTKTSLNNTIYTDKQVAIYEINKVLVPRDLFPAPP<br/>APAPAKPLAEPDPVAPRDASSALVIAWQHRVNVVLFAGGLYIAALVMDP</p>                                                                                                                                                                                                                      |
| PdeFLA15 | <p>MRQRSFVLVLSLVFFFLHCTKTLCQSPAAPAMTPPKTPVKAPPADSSQAPSA<br/>QVATSPGPVDVNKILQKAGHFTVFARLMQATTEDTELNKELENTTNGITILA<br/>PTDNAFSSLKAGFLNSLSDDEKTELVKFHVLPAFISTSQFQTVSNPVRTQAGT<br/>GPRVTLNVTGTFNFISSGLTNTSISGTVYTDSQLAIYQLDKVLPDIFTPK<br/>PPAPAPEPALGPKKAAPDAEAPSAPKDISGAPALLFLLNNALVLAVSCAFGA<br/>MIYS</p>                                                                                                                                                                                                               |
| PdeFLA16 | <p>MAIALSSFNIFTFLVSTFHLGFSFALQENHSNGTYSQGINSNSVLVALLDS<br/>HYTELSELVEKALLQTLEDVAGKHNTIFAPKNEALERDLDPFEKFRLLPEPG<br/>NLKSLQTLLLYHIVPNRINPSHNSSLQHHSTLCRDRVKLSSQESGEKGLIDSAKI<br/>IQVNAVERPDGVIHGIERLLIPRSVQQDFNNRRSLQSIASVKPEGAEVDPRTH<br/>RLKKPAPPAPKPGSAPVLPDIYDAMAGPSLAPAPAPGPGGPHHHFNGEKQVKD<br/>FIETLLLYGGYNEMADILVNLTSLATEMGRVLVSEGYVLTVLAPNDEAMAKLT<br/>TDQLSEPGAPEQIIYYHVIPYQTEESMYNAVRRFGKISYDTLRLPHKVLAEE<br/>ADGSVKFGHPENSAYLFDPIYTDGRISVQGIDGVLPLEEKEKSGPKRKL<br/>ALRLLLSHKGEGGCLKWLAGCLGHLDKIHIAPHASK</p> |
| PdeFLA17 | <p>MQRILTILLSLLFLLSTSTTFTRGHNITHILGKHPSTFTNHYLTLTHLAGEINSR<br/>TTITVCAVDNAAMSELLSKHPSIATIKNILSLHVLLDYFGTKKLHQIREGTAL<br/>AATMFQATGSAPGSTGFVNITDVKGKVAFGPEDNEGNLDVFYVKSLEPIY<br/>NISVIQISKVLPDVAAPAPTEPSAMNITDIMSAGCKVFAGTLIANPEASKTY<br/>QDNIDGGLTVFCPLDDPFKAFFPKFKNLTASGKVSFLEFFGVPIYQSLAMLKS<br/>NNGIMNTLATDGEKKFDFTVQNDGEDVTLKTRISITAKIVGTLIDEQPLAIYTI<br/>DKVLLPKELFKAAPTPAPAPAPEKEVADAPKSSKHKKPSSDVVPSDSPADSPD<br/>GDLADQTADDNASVTLYGGRLVAMVLSLCSGLLLL</p>                                                       |
| PdeFLA18 | <p>MKHHFSVFLFPAIFLLHCTQTLSQTPATAAPAKAPAAASAPPAATSSAQASPP<br/>VMVPVQVSKGPVNVIKILQKAGGFVAFIRLIKSTQEDIQVFSQLNDSRDGVTI<br/>FAPTDGAFAIAIKSGSGSRFALNVITTENMVNVTSGLTNTSVSAIVYTDSQLAI<br/>YQVDKVLLPLDIFAPKALAPAPAPPKPKKDDGAEAPLVPEDTSSSVSCIPLNSL<br/>IIFGAGMVAAVFTL</p>                                                                                                                                                                                                                                                       |
| PdeFLA19 | <p>MVPQFLLSFLSLLHCPPTLAQSPAAPGPPGPTNVTKILEKGGQFSVFIR<br/>LLKATQEDVTLNGQLNNTNNAITIFAPSDNAFSSLKSGTLNSLNDQEKAELV<br/>QFHIIQYLSSSQFQTVSNPLTTQAGSGGRLELNVTTTGNSVNITTGLTNTSVS<br/>GTIYTDNQLAVYQVDKVLLPLVDIFTPKPPTPAPAPEKPKKRSKAAEAPDAPED</p>                                                                                                                                                                                                                                                                                |

|          |                                                                                                                                                                                                                                                                                                                                                                                                                                                                                                                                                                                                             |
|----------|-------------------------------------------------------------------------------------------------------------------------------------------------------------------------------------------------------------------------------------------------------------------------------------------------------------------------------------------------------------------------------------------------------------------------------------------------------------------------------------------------------------------------------------------------------------------------------------------------------------|
|          | NSGAVSLTVLNDVVFFGVGIVAAIFSL                                                                                                                                                                                                                                                                                                                                                                                                                                                                                                                                                                                 |
| PdeFLA20 | MKQQYYSLSFSFLLFLHCTTTFAQTSPAA <del>TF</del> AQ <del>AP</del> AVVAAQPHGITNVTKILEKAGHFTIFIRLLRSTQEENHLFSALNDSSSGVTIFAPTDSAFSELKSGTLNLTSDGDKSELVKFHVVPFTLSTSQFQTVSNPLGTWAGTGNRLPLNVTSTYPNSVNI<br>TTGLTNTLSGTVYTDNQLAIYKIEKVLLPKDIFASK <del>APAPAP</del> V <del>APAP</del> EKSTKAVPAATAE <del>SP</del> V <del>AP</del> VDTSALMFTQNHVVGSVIFAAMFAL                                                                                                                                                                                                                                                                |
| PdeFLA21 | MATTPLSFFLLSLLLSLSLSLNAQAQTPTAPAPTPSGPVNFTAVLVKGGQFATLIRLLNSTQTLNQIENQLNSSSEGMTIFAPTDNAFNNLKAGALNGLNQEQVQLLQYHTLPKFYTMSNLLVSNPVPTQASGQDGVWGLNFTGQSNQVNVSTGLVEVQINNLRQDSPLAVYPVDKVLLEALFGVKPPTA <del>SPPAP</del> SSKSNSTVAAAEPTSKNSAGGRNVALGLVVGLGLVCMGILS                                                                                                                                                                                                                                                                                                                                                   |
| PdeFLA22 | MKQQHSLSSFSFLLLLHCANTFAQTSPAA <del>TF</del> AQ <del>AP</del> AAVVAQPPAA <del>TF</del> TQAAQPHGITNVTKILEKAGHFTIFIRLLRSTQEENHLFSALNDSSSGVTIFAPTDSAFSELKSGTLNTSDGDKSELVKFHVVPFTLSTSQFQTVSNPLGTWAGTGSRLPLNVTSTYPNSVNITTGLTNTLSGTVYTDNQLAIYKIEKVLLPKDIFASK <del>APAPAP</del> V <del>APAP</del> EKPTKAVPSANVE <del>SP</del> V <del>AP</del> VDISSAVTFMHNNVVGLSLVIVAAAMFACNVEGF                                                                                                                                                                                                                                    |
| PdeFLA23 | MASCSHWWH <del>AP</del> VYFIASAVLAFIAISTAMN <del>SP</del> SNNATRPTRPTSNYLSLNASRTLRESGFNIMATLLLI <del>SP</del> EMFFL <del>SP</del> NTTIFAIKDSSLVNTSLPPWFLKNLLQYHTSPLKLSMEDVFKKPQGSCFPTLVDRKKLAVTKIDAKERLAEINHVLVSHPD<br>MVLERRITIHGVL <del>AP</del> FSSLRSKDVFYFGWESIQ <del>AP</del> ICDANSSLVSDANGPRIILEWTRIIHLLSSHRFVSFAIGLNSVLDRILADHKNLSSVTIFAPPELEFVASSSPMLEKIVRLHILPQRATYIELAALPDKQRLRLLPDEDLKITKGVGVGTQGLAINGV<br>EIAAPEIFSSKEFIVHGITQAFKMAKFPNASR                                                                                                                                                    |
| PdeFLA24 | MATLQYSLLLSFTLSALVSTILAHNITDILSGFPEYSEFNKYLTQTKLADEINTRQTITVLALNNGAMTALAAKHPLSVIKNALSLLVLDYYDPTKLHQISKGTT<br>LSTTLYQTTGN <del>AP</del> GNLGFVNITDLQGGKVGFSA <del>AP</del> GSKLDSSYTKSVKQVPYNISILEISQPII <del>AP</del> GILT <del>APAPTP</del> SSVNITALLEKAGCKTFASLLQTSGVIKTYQ<br>SAADKGLTIFAPNDEAFKAAGVPDLSKLTNAEIVSLLQYHATATYSPFGSLKTSKDPISTLASNGAGKFDLTVTSAGDSVTLHTGIGPSRVAETVLDSTPLVIFTVD<br>NVLLPVELFGK <del>APSPAP</del> AGEPVS <del>APSPSPSP</del> VAS <del>SPAP</del> ASVE <del>APSP</del> LAA <del>SPPAPP</del> VE <del>TF</del> GG <del>APAD</del> <del>AP</del> FGSENSTADGSAAVHVSVPVQVTVFATVICILMS |
| PdeFLA25 | MKFSMIIVLSSTLLFSCTPLAYAQKVA <del>SPPAPTPTSPAPAPSP</del> YVNLTDLLSVAGPFHNFLNYLESTKVIDTFQNQANNTDEGITIFVPKDDAFKNLKKASLSNLTQDQLKQLILFHALPHYYSLSDFKNLSHVSPVSTFAGAGGYALNFTDTSGTV<br>HLDSGWSKTKVSSSVHSTDPVAIYQVDKVLLEAIFGTDIPP <del>TPAPAPAP</del> DT <del>SP</del> TAD <del>SP</del> TSDDSAGAGS <del>AP</del> GK <del>SPP</del> NSSYRINGVGIWSQLVLAAGVLVFL                                                                                                                                                                                                                                                         |
| PdeFLA26 | MPRSPLLALAIISLVLIASTTTVNAHNITRILAKHPQFSTFNHYLTVTHLAAEINRRQTITVLALDNAAMSSLSKQLSVYTLRNVLSLHVLVDYFGTRKLHQITNGTELTATMFQATGS <del>AP</del> GASGYVNITDLNGGKVAFGAEDNDGKLDAVYVKSLEEIPYNISILQISQPLNSAEAE <del>APTAAP</del> TLNVTAILSNQGCKAFSDLLIASGAHT<br>TFEENVDGGLTVFCPTDPVINGFMPKYKNLTAPQKVSLLLYHGIPIYQSLQMLKTSNGIMNTLATNGANKYDFTVQNDGEVVTLETKEPLVVYKINKVCCPGSCLRRLRRKKHRRLRGEGCADGPNAD <del>AP</del> SDESDDQTADNDNGVNKMGGGRL                                                                                                                                                                                     |

|          |                                                                                                                                                                                                                                                                                                                                                                                                                                                                                                                       |
|----------|-----------------------------------------------------------------------------------------------------------------------------------------------------------------------------------------------------------------------------------------------------------------------------------------------------------------------------------------------------------------------------------------------------------------------------------------------------------------------------------------------------------------------|
|          | AVVARVSFLGW                                                                                                                                                                                                                                                                                                                                                                                                                                                                                                           |
| PdeFLA27 | MVPQFLFSASFILFFLLHCPPTLAQSPAAAPAPPGPTNVTKVLEKGGQFSVFIR<br>LLKATQEDVTLNGQLNNTNNAITIFAPSDNAFSSLKSGTLNSLSDQEKAELVQ<br>FHIIPQLSSSQFQTVSNPLTTQAGSGGRLELNVTTTGNSVNITTGLTNTSVSG<br>TIYTDNQLAVYQVDKVLPLDIFTPKPPTPAPAPEKSKKRSKAAAEPESPADT<br>SGAVSFTVLNNVFFGVCMVAAIYSL                                                                                                                                                                                                                                                         |
| PdeFLA28 | MDSHYDVSEKTLFLFTLLCFSVASISALPHQNRTGNSTVAGQMINSNSVLVA<br>LLDSHYTELAELVEKALLLQTL EEAVGKHNITIFAPKNEALERQLDPEFKRFIL<br>EPGNLKS LQTLLLFHIIPQRVGSNDWPGHKS NPTRHATLCNDHLHLITKNSG<br>KKFVGAAVLTRPDDVTRPDGVIHGIERLLVPQSVQEDFNRRRNLRISAVLPE<br>GAPEVDPRTHRLKKPEPPVRAGSPFVLPVYDAMSPGPSLAPASAPGPGPHN<br>HFDGESQVKDFIQTL LQYGGYNEMADILVNLTSLATEMGRLVSEGYVLTVLA<br>PNDEAMAKLT TDQLSEPGAPEQIIY YHIIPEYQTEESMYNAVRRFGKIGYDTL<br>RLPHKVVAQEADGSVKFGSGDGSAYLFDPIYTDGRISVQGIDGVLFPEVEK<br>ESTSVKKS VSSVKVATTTPRRGKLMEVACRMLGSLGQDSHFTTCQ |
| PdeFLA29 | MRKQLLSPFVPFLMFFLYSSTTFAQTPSPAPSGPTNITAILAKAGQFTTLIRLLK<br>STQEADQINTQLNNSNQGLTVFAPADNSFANLKAGTLNSLSDQQKVQLVQF<br>HILPNFLSMSNFQTVSNPLRTQAGNSADGEFPLNVTTSGNQVNITTGVNTATV<br>ANTIYTDGQLVVYQVDQVLLPLDLFGTAPAPAPAPSKPEKDVPAKAPAGSKE<br>DASVDSSGASIATVSFGIVLIAAISLKL                                                                                                                                                                                                                                                       |
| PdeFLA30 | MSTM LLLFLLILLISSVLAASFNAMEILSTSGYLSMALTLEITSKRLHLES<br>SAATIFAPLDIALARLGQLSVLDLQYHISFVRLSGYLDLSPFGTRIPTLLPNH<br>SLIVTTSLSYFDGKLSINGISIEESALVDFGSLIIFGTSEFFNSSLEISPNLTPAPAP<br>SPSEAWMSTFFGQASHLLMPRGYSIMGTFLDAQLFGIKNQTRLTIFAPVDQA<br>MDAYAKNVSDYSSIFRKHVVPGLFPRQDLEGFNDGTSLPTFSGGFMINLTKS<br>GDVLVLNSVPVIFPEMYQSDWLIHGLNQLLMPPLKEEELVGESFSELDGAE<br>DKPDVLD FDDYVYGAP                                                                                                                                               |
| PdeFLA31 | MAPINPAISHITPTTTLTYFLLLLATT TTTTPILAITNL TALLSSFPDFSSFTSLIT<br>SIPSLTSDLSDRSALTLLVIPNSYLSSSLDLTRRLSPSALADLLRYHILLQYLSSS<br>DLHQVPPSGALITTLFQTTGRASSNSGSVNITRNPVTNAITISSPSPFSSSNATV<br>LSLIMTLPYNVSIISVNSLLVPYGFDLMASETRPTLGLNITKALLDGHSFLVAA<br>SLLSASGVVQFEADEGGAGITLFVPTDSAFSDLSATAISLQSLPADKKADV L<br>KFHVLHSYYPLGSLESIVNPVQPTLATEDMGAGSFTLNISRVNGSVAIDSGIV<br>QASVTQTVFDQNPVVIFGVSKVLLPKEIFGRNPMLTSKPGNTDMGNAQPPVS<br>ALSPENSPKMLSSAPGVREEIKSGVGGLQWLSTLHLLCVFVCNCI                                               |
| PdeFLA32 | MGPQNL MINKSTAKILLHLLLSLLHQITTA TLTDQELDFALSSRLSYGYTLFP<br>NAISTSDLRLQLLNQSSNATSTSTFTLFCPPDSLLFSVDLASTAPHYTKSLFLH<br>VSPSRLSTSDLRNLTAASGGTYIDSLVPNHRLLIANS LAQLNGTVDG SILVNR<br>VRVSVPDFLFGSDIAVHGLDGILVAGFEDKVEDTSFEATWSPANAIGSAERN<br>SPLAGRFPARRRKGRNHRQNGRNGGIRRNRHRGRRINGGRRHRGGRNVSGG<br>TRGDGVTHGAFAMYNHRL                                                                                                                                                                                                     |
| PdeFLA33 | MEAF T TLLVLLMIKVLCVSTSP TDIPSR SQDLFVATDEMARAN YFSFVMLINM<br>APLDQKFQGNVTFLMPKDRILSKIRMHPNAVSDFLLRHSIPSLLFDHLLHIP P<br>GSLIPSSNP DYMLNISNKGRKSFFLN NVKISSPDLCTAGSSIRCHGIDGVLLVA                                                                                                                                                                                                                                                                                                                                      |

|          |                                                                                                                                                                                                                                                                                                                                                                                                                                                                                                                                                                                                                                  |
|----------|----------------------------------------------------------------------------------------------------------------------------------------------------------------------------------------------------------------------------------------------------------------------------------------------------------------------------------------------------------------------------------------------------------------------------------------------------------------------------------------------------------------------------------------------------------------------------------------------------------------------------------|
|          | TDRHPLPACSNSTSPAVVA <del>TPPSP</del> SLPLPDIPSPFPSS <del>APP</del> PGAA <del>APT</del> DQEHNPKH<br>SGSSQLESLSLGGLLKFMATSILLLNARVLYTVGLN                                                                                                                                                                                                                                                                                                                                                                                                                                                                                          |
| PdeFLA34 | <del>MATSPLSLVLLSVFLSLSLHAQAQ</del> <del>APAAPAPAP</del> SGPVNFTAVLVKGG <del>QFVTFIS</del><br><del>LLNKTQTFNQIENQINSSSEGMTIFAPTDNAFSLKSGALNGLSQQQQVQLL</del><br><del>QYHMLPKFYSLSNLLLVSNPVPTQASGQEGVWGLNFTGQSNQVNVSTGLVE</del><br><del>VQVNNALRQDFPLAVYPVDKVL</del> <del>LP</del> PEELFGAKPPSA <del>SPPAP</del> ATKGSSSGKSNSS<br>DTAAEP <del>SP</del> GKNSAGGRNVALGLIFGLGFVSVGILS                                                                                                                                                                                                                                                |
| PdeFLA35 | <del>MKQQSISFFIFLLFLQCTYTFAQ</del> <del>SP</del> AA <del>AP</del> AQ <del>AP</del> AVVA <del>SPP</del> AA <del>APT</del> QAA <del>APH</del> GIT<br>NVTKILEKAG <del>HFTIFIRLLRSTQEENHLFSALNDSSTGLTIFAPTDSAFSELKSG</del><br><del>TLNTLSGDGKSELVKFHVVPTFLSTSQFQTVSNPLGTWAGTGNRLPLNVTSY</del><br><del>PNSVNITTGLTNTSLSGTVYTDNQLAIYKIEKVLLP</del> KDIFASN <del>APAPAP</del> V <del>APAP</del><br>EKPAKAVPAANVE <del>SP</del> V <del>AP</del> VDISSAVWFMHNNVVGSGVIVASAVFAL                                                                                                                                                             |
| PdeFLA36 | <del>MKQQLISSFSIFLLFLHCANTFAQ</del> IPAA <del>AP</del> AQ <del>AP</del> AVVV <del>APP</del> AA <del>APT</del> QAA <del>APH</del> G<br>ITNVTKILEKAG <del>HFTIFIRLLRSTQEESHLSALNDSSTGLTIFAPTDSAFSELKS</del><br><del>GTLNTRLRDGKSELVKFHVVPTFLSTSQFQTVSNPLGTWAGTGSRLPLNVTS</del><br><del>YPNSVNITTGLTNTSLSGTVYTDNQLAIYKIEK</del> GMKKVRVSFFKAKGPKA                                                                                                                                                                                                                                                                                   |
| PdeFLA37 | MASHNVTKILEKAG <del>HFTIFIRLLRSTQEENHLFSALNDSSTGLTIFAPTDSAFS</del><br><del>ELKSGTLNTRLSDGKSELVKFHVVPTFLSTSQFQTVSNPLGTWAGTGNRLPL</del><br><del>NVTSYPNSVNITTGLTNTSLSGTVYTDNQLAIYKIEKVLLP</del> KDIFASN <del>APAPAP</del><br>V <del>APAP</del> EKPAKAVPAANVE <del>SP</del> V <del>AP</del> VDISSAVWFMHNNVVGSGVIVAAAVFAL                                                                                                                                                                                                                                                                                                            |
| PdeFLA38 | <del>MKQQSISFFIFLFFLQCTYTFAQ</del> <del>SP</del> AA <del>AP</del> AQ <del>AP</del> AVVVAQPPAA <del>TP</del> AQAA <del>APH</del><br>GITNVTKILEKAG <del>HFTIFIRLLRSTQEENHLFSALNDSSTGLTIFAPTDSAFSEL</del><br><del>KSGTLNTRLSDGKSELVKFHVVPTFLSTSQFQTVSNPLGTWAGTGSRLPLNV</del><br><del>TSYPNSVNITTGLTNTSLSGTVYTDNQLAIYKIEKVLLP</del> KDIFASN <del>APAPAP</del> V <del>A</del><br><del>PAP</del> EKPAKAVPAANVE <del>SP</del> V <del>AP</del> VDISSAVWFMHNNVVGSGVIVASAVFAL                                                                                                                                                              |
| PdeFLA39 | <del>MPRSLPLLALAI</del> SLVLIAS <del>TTT</del> VNA <del>HN</del> ITRILAKHPQFSTFNHYLTVTHLAAEI<br><del>NRRQTITVLALDNAAMSSLSISKLSVYTLRNVLSLHVLVDYFGTRKLHQITN</del><br><del>GTELTAT</del> MFQATGS <del>AP</del> GASGYVNITDLNGGKVAFGAEDNDGKLDVYVKS<br>EEIPYNISILQISQPLNSAEAE <del>APT</del> A <del>AP</del> TLNVTAILSNQG <del>CKAFSDLLIASGAHT</del><br><del>TFEENVDDGLTVFCPTDPVINGFMPKYKNLTAPQKVSLLLYHGIPIYQSLQML</del><br><del>KTSNGIMNTLATNGANKYDFTVQNDGEVVTLET</del> KVTTATITGTVKDEEPLV<br><del>VYKINKVLLPRELFKA</del> <del>AP</del> EKK <del>APAP</del> KGEKDVADGPNAD <del>AP</del> SDESDDQTADN<br>DNGVNKMGGGRLAVVAPSFFFGVVMFFLED |
| PdeFLA40 | <del>MRQQYVFTTLTLLILFSLSCSTTLA</del> <del>Q</del> APAL <del>APAP</del> SGPTNVTKILEKAG <del>QFTLFI</del><br><del>RLLKSTQVANQLLQQLNNSNNGMTVFAPTDNAFSSLKSGTLNSLTDEQKVE</del><br><del>LVQFHIVPTYLTSSQFQTISNPLRTQAGDSGDGKFPLNITTSGNSVNITTGLTN</del><br><del>TSVSGTIYTDGQLAVYQIDQVLQPLQIF</del> <del>AP</del> RPP <del>APAPAP</del> AKSKNKKATTVAD <del>SP</del><br>DV <del>TP</del> ADNSKAATLQNVGLFGVAALVIALSL                                                                                                                                                                                                                         |

Green: Signal peptide; Red: AGP-like glycosylated regions;  
Yellow: Fasciclin domain; Gray: GPI-anchor protein;
