# Supplementary material for: Genome-Wide Comparative Analysis of the Fasciclin-like Arabinogalactan Proteins (FLAs) in Salicacea and Identification of Secondary Tissue Development-Related Genes
Source: MDPI journal article supplement (doi:10.3390/ijms24021481), 2023-01-12
Supplement: s1 [file s1]

**Supplemental Table S2.** Prediction of conserved structural domains of FLA proteins in *Salix suchowensis*.

| Name    | Precursor protein backbones                                                                                                                                                                                                                                                                                                                                                                                                                                                                     |
|---------|-------------------------------------------------------------------------------------------------------------------------------------------------------------------------------------------------------------------------------------------------------------------------------------------------------------------------------------------------------------------------------------------------------------------------------------------------------------------------------------------------|
| SsuFLA1 | <p>MDSHYGVSKQTLFLFTLLCFSVASISALPHQNKGTGNSTVTGQMINSNSVLVALLDSEHYTELAELVEKALLLQTL EEAVGKHNITIFAPRNEALERQLNPEFKRFLLEPGNLKSLQTL LLFHIIPQRVDP AHHS LQRPPGVNHKNSGKKLVGSAALTRPNDVTRPDGVIHGIERLLVPQSVQEEFNRRRNLRSSISAVLPEGAP EVDPRTHRLKKSEPPVRAGSQPVLPIYDAMSPGPSLAPAPAPGPGGPHHHFDGESQVKDFIQTL LHYGGYNEMADILVNLTSLATEMGR LVSEGYVLT V LAPNDEAMAKLTTDQLSEPGAPEQIIYYHIIPEYQTEESMYNAVRRFGKIGYDTRLRLPHKVVAQEA DGSVKFGSGDGSAYLFD PDIYTDGRISVQ GIDGVLP E VEKESTSVKKS VSSV KIATTTPRRGKLMEVACRVLGTFGQDSHFTTCQ</p> |
| SsuFLA2 | <p>MRKQLLSPFVPFLMFFFLYSSTSLAQTPSPAPSGPTNITAILEKAGQFTTLIRLLMKSTQEADQINTQLNNSNQGLTVFAPT DNSFSSLKAGTLNSLSDQQKVQLVQFHILPSFLSMSNFQTVSNPLRTQAGNSADGEFPLNVTTSGNQVNITTGVNSATVANTIYTDGQLVVYQVDQVLLPLDLFGAAPAPAPAPSKPEKDVPAKAPAGSKEDASVDASGASIAAVSFGAVLIAAISLKI</p>                                                                                                                                                                                                                                       |
| SsuFLA3 | <p>MSEMLSKNPSITTIKNILSLHVLLDYFGAKKLHQIRDGSALSATMFQATGSAPGSTGFVNITDVKGKVAFGPKDNGGNLDVFYVKSVEEIPYNISVIQSKLFPSDVAAAPTPAPSAMNLTDIMSAHGCKVFADTLIANPDASKTYQDNIDGGLTVFCPLDDPFKAFLPKFKNL TASGKESFLEFYGVPIYQSLAMLKSNNGIMNTLATNGDKKFDFTVQNDAEDVTLKTRSTTAKIVGTLIDEQPLAIYSIDKVLLPKELFKAAPTPAPAPAPEEAADAPKSSKHKKPAADAAPSDSPADSP EGD AADQTADNNASVRLDGGRLVAIVLSLCLGLLLL</p>                                                                                                                                    |
| SsuFLA4 | <p>MDKYLLSFLLLLTTTTTTATSRSSSTFNIISTFGPTPSPPTSAA TPAPNPITNSNTRI AFSPTYAPSPITTVPTTPAPSSAPTPINNTTNTSATLAPTTTPTLTAPAPTPATETTLTPTSAPSPAPTPTTETTLTPTSAPITAPTPSITSILETSPAPTPIS TPVTTVTFSLSPTPRSP LTPQQDELKFVIEQEIYNVIDAILGAGDFKNWANALTMADSTTFPISSTFFIPSDNSLSPATTTADPDIVPYHIVPQRLSFADLQQFKAFSRLPTLLFDKSLITNNSASNFTLDASRLTHPNIYTNA AIAVHGIDNLLDHSVYGTESGKKSSKPNAAAGPPP TPDSPPPRAFVPSTADHEELTVHHHGESDAACLCTGVWTVFLVLC AALASKFHIMTLVH</p>                                                                  |
| SsuFLA5 | <p>MQQFILLLSLLFLHNCSTRLCQSSVQSPPTTKAPVPPPSLAVPTDTIKILLKAGRFLSFVRLMKATQVDTQLFSQLNSSTDGITIFAPNDNAFSSRVAGAVGSLNDR EKLEFVQFHILPRFLSISDFQTVSNPVKTLAGSDNKLPLTITTS DNSVKISSGLTKTSISNTIYTDKQVAIYEV D KVLVPKDLFPPAPPAPAPSKPVEESPVVPRDASAGAIIVLHHHLVFFGVGVYIAALVFTL</p>                                                                                                                                                                                                                                   |
| SsuFLA6 | <p>MRQRSVSLVFLSLILFFLQYCTR TSGQSPAAAPAMPPTTPVKAPPNAPSQAPSAQVATSPGPVDVGKILQKAGHFTVFVRLMQATTEDAELNKELNTTNNGITIFAPSDNAFSSLSKSGFLNALSD EDKTELVKFHVLPALISSSQFQTVSNPVRTQAGTGPRVALNVTTTGNFVNISTGLTNTSISGT VYTDSQLAIYQIDKVLFPVDIFT PKPPAPAPAPPELGKPGKAAPGAE SPTAPKEISGALTPLILVHNNALTLAVSCMV</p>                                                                                                                                                                                                         |

|          |                                                                                                                                                                                                                                                                                                                                                                                                                                                                                                                        |
|----------|------------------------------------------------------------------------------------------------------------------------------------------------------------------------------------------------------------------------------------------------------------------------------------------------------------------------------------------------------------------------------------------------------------------------------------------------------------------------------------------------------------------------|
|          | AAIFS                                                                                                                                                                                                                                                                                                                                                                                                                                                                                                                  |
| SsuFLA7  | MTMRKQLLSPLVPFLIFFLCISTTVAQTPSPAPSGPANITAVLEKAGQFATFIRL<br>MKSTQEANQINTQLNNSNQGLTVFAPTDNAFTNLKAGTLNSLSDQQKVQLV<br>QFHILPNFLSMSSFQTVSNPLRTQAGNSAAGEFPLNVTTSGNQVNISTGVDTA<br>TVANTIFTNGQLVVYQVDQVLLPLDLFGTAAAPAPAPSKPDKDVPKAPAGS<br>KEDASVDTSGATIAAVSVSAVLIAAISLKL                                                                                                                                                                                                                                                       |
| SsuFLA8  | MRRQSFIASFLLFFLLCTKTLGQSPAAAPVKAPTAAAAQTEAAQVAAAPGPV<br>DIIKILQKAGHFTVFVRLMQATTEDIELNKELNNTNNGITIFAPSDNAFSSLKA<br>GFLNSLSDDEKTELVKFHVLPAFIASSQFQTVSNPVRTQAGTGPRVTLNVTTA<br>GNFVNISTGLTNTSLSTVYTDSQLAIYQVDKVLFPDIFTPKPPAPAPAPAELE<br>RPKKAAPDVEAPTAAKDISGAFTAVVHNNAVLLAISVVAAIFFP                                                                                                                                                                                                                                       |
| SsuFLA9  | MGMAQINPAISHITPTTTLCTCYFLLLLLSTTPILAITNITALLSSFPDFSSFTSLLA<br>STPSITSDLSNRSALTLLVIPNSYLSSSLDLTRRLSPSSRTDLLRYHILLQYLS<br>DLHHLPPAGALITTLFQTTGRASANFGSVNITRNPVTNAITISSPSPFSSSNATV<br>LSLIKTLPYNVSIISVNSLLVPYGFDLMASETRPPLGLNITKALLDGHNFVAA<br>SLLSASGVVQEFAYEGGAGITLFVPTDSAFADLSENDPTLATEDMGAGSFT<br>LNISRANGSVAIDSGIVLASVTQTVFDQNPVAFGVSKVLLPKEIFGSPVLT<br>KPGNSDMGNAQPPAVALSPESAPKMLSSAPGAREEIKSGVGGSQWLSNLPFL<br>CVVAVWYCI                                                                                            |
| SsuFLA10 | MDSHIYGVSKKTLFLFTLLCLSVSSISALPHQNKAGNSTGSGQMINSNSVLVA<br>LLDSHYTELAELVEKALLLQTL EEAVGKHNITIFAPRNEALERQLDPEFKRFL<br>LEPGHKSNSPSRHTTLCNDHQHLITQNSGKKLVGSAEVRPDDVIRPDGVIHGI<br>ERLLIPQSVQEDFNRRRNLRSSISAVLPEGAP EVDPRTHRLKKPEPPVRAGSPP<br>VLPIYDAMSPGPSLAPAPAPGPGGPHHHFDGESQVKDFIQTL LLYGGYNEMA<br>DILVNLTSLATEMGRVLVSEGYVLTVLAPNDEAMAKLTDDQLSEPGAPEQIIYY<br>HIIPEYQTEESMYNAVRRFGKIGYDTLRLPHKVVAQEADGSVKFGSGDGSAY<br>LFDPDYTDGRISVQGIDGVLFPEVEKESTSVKKSFSVSVKATTNPRRGKLM<br>VACRMLGTLGQDSRSLHVNEYTVKSRRKRKKRVKMAGTMKTIDKW |
| SsuFLA11 | MDSHIYGVSKKTLFLFTLLCLSVSSISALPHQNKAGNSTGSGQMINSNSVLVA<br>LLDSHYTELAELVEKALLLQTL EEAVGKHNITIFAPRNEALERQLDPEFKRFL<br>LEPGNLKSLQTL LLFHII PQRVGSNDWPGHKSNSPSRHTTLCNDHQHLITQNSG<br>KKLVGSAEVRPDDVIRPDGVIHGI ERLLIPQSVQEDFNRRRNLRSSISAVLPEG<br>AP EVDPRTHRLKKPEPPVRAGSPPVLPIYDAMSPGPSLAPAPAPGPGGPHHHF<br>DGESQVKDFIQTL LLYGGYNEMADILVNLTSLATEMGRVLVSEGYVLTVLAPN<br>DEAMAKLTDDQLSEPGAPEQIIYYHIIPEYQTEESMYNAVRRFGKIGYDTLRL<br>PHKVVAQEADGSVKFGSGDGSAYLFDPDYTDGRISVQGIDGFCFPRSRRKV<br>LLLRNPSVLLRLPLPIQEEGN                    |
| SsuFLA12 | MDSHIYGVSKKTLFLFTLLCLSVSSISALPHQNKAGNSTGSGQMINSNSVLVA<br>LLDSHYTELAELVEKALLLQTL EEAVGKHNITIFAPRNEALERQLDPEFKRFL<br>LEPGNLKSLQTL LLFHII PQRVGSNDWPGHKSNSPSRHTTLCNDHQHLITQNSG<br>KKLVGSAEVRPDDVIRPDGVIHGI ERLLIPQSVQEDFNRRRNLRSSISAVLPEG<br>AP EVDPRTHRLKKPEPPVRAGSPPVLPIYDAMSPGPSLAPSSRTRWAHHHFD<br>GESQVKDFIQTL LLYGGYNEMADILVNLTSLATEMGRVLVSEGYVLTVLAPND<br>EAMAKLTDDQLSEPGAPEQIIYYHIIPEYQTEESMYNAVRRFGKIGYDTLRLP                                                                                                     |

|          |                                                                                                                                                                                                                                                                                                                                                                                                                                                                                                   |
|----------|---------------------------------------------------------------------------------------------------------------------------------------------------------------------------------------------------------------------------------------------------------------------------------------------------------------------------------------------------------------------------------------------------------------------------------------------------------------------------------------------------|
|          | HKVVAQEADGSVKFGSGDGSAYLFDPDYTDGRISVQGIDGVLFPEVEKEST<br>SVKKSFSVSVKVATTNPRRGKLMVACRMLGTLGQDSRFTTCQ                                                                                                                                                                                                                                                                                                                                                                                                 |
| SsuFLA13 | MDSKASSLLFIAFLCLISTSTAFNITRILAQYPEFASFNDLLSQSGLAQEMNGR<br>QTITVLALDNGSIDGLSGRPLDIAKRILSAHVILDYDQIKLSKLQKASTIVTT<br>LYQASGVAEDRQGFLNISRTAEGIKFGSAMKGAPLSASLVKSIYSQPYNISVL<br>QVSEPIETPGIENMAPPPPGTAAVPPKTPAPAPSTKTPPAAPTAKTPAKSPAK<br>SPSKAPAPSKEGPSTPTEAPAGGPVADGPVADVPSNSPGPDKAASSRMHVAG<br>ATVVIGLFIACIMGF                                                                                                                                                                                      |
| SsuFLA14 | MESSLKFLILLIFSFSIITISIAFDGVETTTNLSPSPPPQQQRITSPPPQVSNSDNL<br>HDHSFFSHTTLLAPILSHLGFTQLAMVAPSLSADPTTTAWSGPFTLFAPSDSSL<br>STCFSCSIPDLLREHIVPGLFTIDYLRKLAFGTKIETLSPGRCMTVTSNSLNND<br>TVSHSSVKVFIGGVEITHPDLFNNGVLIHGIQGYIAPLSPLSCDVERLSSLSFP<br>NHERVTPHVTSTTHQQGVGTLMQPAIMRLMLRDAMLRLRNNGFTILSLAMR<br>VKYPELVTLANMTVFALDDVSIFSGSHGYINSVRFHIVPNHYLSITDLERLPV<br>GASLPTLERGQALVVTSAGGFNMAVPMRINYVRVKVPDLMKNLKIHAVHSVY<br>LPFPRIHPTSAAPYDEITGGGGGGYNVVAEEAEDGACSMVYEEDGSNCW<br>MVPPMPAQVKPSVAVQIDEDHHGL  |
| SsuFLA15 | MESSLKFLILLIFSFSIITISIAFDGVETTTNLSPSPPPQQQRITSPPPQVSNSDNL<br>HDHSFFSHTTLLAPILSHLGFTQLAMVAPSLSADPTTTAWSGPFTLFAPSDSSL<br>STCFSCSIPDLLREHIVPGLFTIDYLRKLAFGTKIETLSPGRCMTVTSNSLNND<br>TVSHSSVKVFIGGVEITHPDLFNNGVLIHGIQGYIAPLSPLSCDVERLSSLSFP<br>NHERVTPHVTSTTHQQGVGTLMQPAIMRLMLRDAMLRLRNNGFTILSLAMR<br>VKYPELVTLANMTVFALDDVSIFSGSHGYINSVRFHIVPNHYLSITDLERLPV<br>GASLPTLERGQALVVTSAGGFNMAVPMRINYVRVKVPDLMKNLKIHAVHSVY<br>LPFPRIHPTSAAPYDEIIGGGGGGYNVVAAEEAEDGACSMVYEEDGSNCW<br>MVPPMPAQVKPSVAVQIDEDHHGL |
| SsuFLA16 | MAMAPSTSCSNIFFAFLLLSFFYPGFSSTLQENHGNGSYSGQISSNSVLV<br>ALLDSHYTELAELVEKALLQTLEDVGEHNITIFAPKNEALERDLDFEFKRF<br>LLEPGNLKSLQTLLLYHIVPNRINLSRNTSAHHRSTLCRDRIKLSSQESGEKFI<br>DSAKIIQVNAVERPDGVIHGIERSLQSIKAVKPEGAPAEVDPRTHRLKKPAPPSK<br>PAPAPGPGGPHHHFNGEKQVKDFIETLLLYGGYNEMADILVNLTSLATEMGR<br>LVSEGYVLTVLAPNDEAMAKLTQDSEPGEQIIYYHVIPEYQTEESMYN<br>AVRRFGKISYDTRLRLPHKVLAQEADGSVKFGHAENSAYLFDPDYTDGRISV<br>QGIDGVLFPLEEEKLDTKTEIKSVKVAAPQRRGKLLEVACRMLGTGFKDSH<br>FTTCQ                                |
| SsuFLA17 | MAATKILLSLLSLFSLPSSFSIPTETLREAAVTLNSNGYLSMSLTPLVSNLL<br>PHITPSLTIFSPCDTAFTQAGQPPLSILRLHFSPLSFPLNSLESLSLGAKIPTLFPN<br>HSLTITSTGYDISLNGVKIRDSPVYDDGSLVILGVDRFFDPGFGASGQNLGCS<br>VKVSSDCYSYNEASRVLKSKEYSVMASFLDLQLMAGFKDKTALTIFAPVDE<br>VIKAFLGDLSEYSSMFRKHVVPCKIMWGDVNFDDGVVLETYLKGFIAVS<br>TSGDNLMLNDQASVNFPMYHNDWLVIHGLRSILMEPESEYSFLDDGDEF                                                                                                                                                       |
| SsuFLA18 | MRPQSFIISVLSLILFFLHCTKTLCQSPAAAPAMAPPTTPVKAPFADSSQAPSAQ<br>VATSPGPVDINKILQKAGHFTVFARLMQATTEDTELNKNLNTNNGITILAPT<br>DSAFSSLKAGFLNSLSDKTELVKFHVLPAFISTSQFQTVSNPVRTQAGTGP                                                                                                                                                                                                                                                                                                                            |

|          |                                                                                                                                                                                                                                                                                                                                                                                                                                                                                                                                                                                                                                                |
|----------|------------------------------------------------------------------------------------------------------------------------------------------------------------------------------------------------------------------------------------------------------------------------------------------------------------------------------------------------------------------------------------------------------------------------------------------------------------------------------------------------------------------------------------------------------------------------------------------------------------------------------------------------|
|          | RVTNLNVTTTGNFVNISGLTNTSISGTVYTDSQLAIYQLDKVLYPLDIFTPKPP<br>APAP <sup>EP</sup> ALGKPGKA <sup>AP</sup> GVE <sup>SPT</sup> AP <sup>KD</sup> ISAAPTQLFLHDNALLAVSCAFAVIIS                                                                                                                                                                                                                                                                                                                                                                                                                                                                            |
| SsuFLA19 | MAMAMAQSSSNIFFTFLLFSTFHLGFSSA <sup>LQ</sup> ENHSNETYSGQINSNSILVALL<br>DSHYTELAELVEKALLLQTLEDAVGKHNITIFAPKNEALERDLDPFKRFLLE<br>PGNLKSLQTLLLYHIVPDRVNLSHTSSVHHHSTLCSDRVKLSGQKSGDNLIDS<br>AKIIQVNAVERSDGVIHGIEKLLIP <sup>RS</sup> VQQDFNNRRSLRSISAVKPEG <sup>AP</sup> EVDP<br>RTHRLKIP <sup>AP</sup> PEKPGSPVLPIDYDAM <sup>AP</sup> GPSL <sup>AP</sup> AS <sup>TP</sup> AP <sup>GG</sup> PHNHFNGEKQV<br>KDFIETLLSYGGYNEMADILVNLT <sup>SL</sup> ATEMGRVLVSEGYVLTVLAPNDEAMA<br>KLPTDQLSEPGAPEQIIYYHVIPEYQTEESMYNAVRRFGKISYDTLSLPHKVL<br>SQEADGSVKFGDAENSAYLFDPIYTDGRISVQGIDGVL <sup>FP</sup> IEEKEKSQTKME<br>IKSVKVAVKPQRRGRLLLEVACRMLGTFGQDSHFTTCQ |
| SsuFLA20 | MQRLTLLLSLIFFLSTATTFTRG <sup>HN</sup> ITHILGKHP <sup>SF</sup> STFNHYLT <sup>TL</sup> HLAGEINRR<br>TTITICAVDNAAMSELLSKHPSIATIKNILSLHVLLDYFGTKKLHQI <sup>RD</sup> GTALA<br>ATMFQATGS <sup>AP</sup> GSSGFVNITDVKGKVGFGPEDNEGNLDVFYVKSLEEIPYN<br>ISVIQISKVLPDVA <sup>APT</sup> PEPSAMNLTDIMSAHG <sup>CK</sup> VFADALLANPEASKTY<br>QDNMDGGLTVFCPLDDPFKAFSPRFKNLTASGKVSFLEFFGVPVYQSLAMLR<br>SNGIMNTLATDGEKKFDFTVQNDGEEVTLKTRSVTAKIAGTLIDEQPLAIY<br>TIDKVLLP <sup>KEL</sup> FKA <sup>APAPAP</sup> EKEVA                                                                                                                                               |
| SsuFLA21 | MKNHFSVFLFSAILLSLHCNQTL <sup>QS</sup> PAA <sup>AP</sup> AK <sup>AP</sup> AAAS <sup>APP</sup> PAATSTAQAS <sup>SP</sup><br>PVMVPVQVSKGPVNVIKILQKAGGFAVFIRLIKSTQEDIQVFSQLNDSRDGVT<br>IFAPTDGAFS <sup>AI</sup> KSGVLNSLSVLNSLS <sup>SD</sup> HQKIELVQFHIIPKILTTANFQT <sup>VS</sup> NP<br>ITTLAGSGSRFALDVITTENMVNVTSGLTNTSVSAIVYTDSQLAIYQVDKVLL<br>PLDIF <sup>AP</sup> KS <sup>LAPAPSPP</sup> KPKKDDGEE <sup>TP</sup> VVPEDISGAVSCAMLNSLVIFGAGM<br>AAAVFPL                                                                                                                                                                                          |
| SsuFLA22 | MLLKLAQ <sup>SP</sup> AA <sup>AP</sup> GPPGPANVTKILEKGG <sup>QF</sup> SVFTRLLKATREDVT <sup>LN</sup> GQLN<br>NTNNAITIFAPSDSAFSSLKPGTLNSLNDQEKAELVQFHIIPQYLSSSQFQTLN<br>VTTAGNSVNITTGLTNTSVSGTIYTDNQLAVYQVDKVLLP <sup>VD</sup> IF <sup>TP</sup> KPPPP <sup>AP</sup><br>AP <sup>EK</sup> TRRGSKSAE <sup>SP</sup> DTSVDNSGAVTLNVLDNAVFFGVGIVAVIFSL                                                                                                                                                                                                                                                                                                 |
| SsuFLA23 | MKQQCSLSFFSFLLLRCTSTFA <sup>QS</sup> PAAA <sup>AP</sup> AAQ <sup>AP</sup> AAVVAQPPAA <sup>TP</sup> AAQAQ<br>PHGAITNVTKILEKAG <sup>HFT</sup> IFIRLLRSTQEDSHLFSALNDSSSGVTIFAPTDGAF<br>SELKSGTLN <sup>TL</sup> SDGDKSELVKFHVVP <sup>TF</sup> LSTSQFQTVTNPLGTWAGTGNRLP<br>LNVTSYPNSVNITTGLTNTSLSGTVYTDSQLAIYKIEKVLLP <sup>KD</sup> IFASK <sup>APAPA</sup><br>PV <sup>APAP</sup> EKPTKAVPAATVE <sup>SPVAP</sup> VDIPVHFCSLKIMWWDPLA                                                                                                                                                                                                                 |
| SsuFLA24 | MATTPLSLFLLSLLLSLSLYAQAQ <sup>TPA</sup> APAP <sup>TP</sup> SGPVNFTAVLEKGGQFVTLIR<br>LLNKTQTLN <sup>QID</sup> NQLN <sup>SS</sup> SEGMTVFAPTDNAFN <sup>NL</sup> KAGALNDLSQ <sup>QE</sup> QASG<br>PDGVWGLNFTGQSNQVNVSTGLVLVQINN <sup>AL</sup> RQDFPLAVYPVDKVLLPEAL<br>FGVKPPSA <sup>SPPAP</sup> SSKSNATEAAAGPTTDN <sup>NA</sup> AGGRNVALGLVVGLGLVCIGI<br>LS                                                                                                                                                                                                                                                                                       |
| SsuFLA25 | MTLHLRTA <sup>AP</sup> AAQ <sup>APP</sup> AVVAQPPAA <sup>TP</sup> TQAA <sup>AP</sup> HGITNVTKILEKAG <sup>HFT</sup> IFIRL<br>LRSTQEENHLFSALNDSSSGLTIFAPTD <sup>SA</sup> FSELKSGTLN <sup>TL</sup> SDGDKSELVKFH<br>VVPTFLSTSQFQTVSNPLGTWAGTGSRLPLNVTSYPNSVNITTGLTNTSLSGT<br>VYTDSQLAIYKIEKVLLP <sup>KD</sup> IFASN <sup>APAP</sup> EPVQ <sup>AP</sup> VREKPTKAVPAANVE <sup>SPV</sup><br>AP <sup>VD</sup> ISSSVTFMQNSVIGSVGIVLAAAMFAL                                                                                                                                                                                                              |

|          |                                                                                                                                                                                                                                                                                                                                                                                                                                                      |
|----------|------------------------------------------------------------------------------------------------------------------------------------------------------------------------------------------------------------------------------------------------------------------------------------------------------------------------------------------------------------------------------------------------------------------------------------------------------|
| SsuFLA26 | MKKQYSSISFSVFILFLHCSNTFAQSPAAAPAAQAPPAVVAQPPAATPTQAAAAPN<br>GITNVTRILEKAGHFTIFIRLLRSTQEENHLFSALNDSSSGLTIFAPTDsafSEL<br>KSGTLNtLSDGDKSELVKFHVVPTFLSTSQFQTVSNPLGTWAGTGSRLPLNV<br>TSYPNSVNITTGLTNTSLSGTVYTDNQLAIYKIEKVLLPKDVFVGSKAPAPAPA<br>APVREKPTKAVPEATVESPVSPVDISSALMFTHNNVVGsvGMVAAAMFAL                                                                                                                                                          |
| SsuFLA27 | MKKQYSSISFSVFILFLHCSNTFAQSPAAAPAAQAPPAVVAQPPASTPTQAAAAPN<br>GITNVTRILEKAGHFTIFIRLLRSTQEENHLFSALNDSSSGLTIFAPTDsafSEL<br>KSGTLNtLSDGDKSELVKFHVVPTFLSTSHRLPLNVTSYPNSVNITTGLTNTS<br>LSGTVYTDNQLAIYKIEKVLLPKDVFVGSKAPAPAPAAPAREKPTKAATVESPV<br>SPVDISGALMFTHNNVVGsvGIVAAAMFAL                                                                                                                                                                             |
| SsuFLA28 | MRKQYSLSSFSFFILFLHCTNTFAQSPAAAPAAQAPAAVVAQPPAATPTQAAAAP<br>HGITNVTKILEKAGHFTIFIRLLRSTQEENHLFSALNDSSSGLTIFAPTDsafSE<br>LKSGTLNtLSDGDKSELVKFHVVPTFLSTSQFQTVSNPLGTWAGTGSRLPLN<br>VTSYPNSVNITTGLTNTSLSGTVYTDSQLAIYKIEKVLLPKDIFASNAPAPAPV<br>QAPVREKPTKAVPAANVESPVAPVDISSSVTFMQNSVIGsvGIVAAAMFAL                                                                                                                                                          |
| SsuFLA29 | MKKQYSSISFSVFILFLHCSNTFAQSPAAAPAAQAPPAVVAQPPAATPTQAAAAPN<br>GITNVTRILEKAGHFTIFIRLLRSTQEENHLFSALNDSSSGLTIFAPTDsafSEL<br>KSGTLNtLSDGDKSELVKFHVVPTFLSTSQFQTVSNPLGTWAGTGSRLPLNV<br>TSYPNSVNITTGLTNTSLSGTVYTDNQLAIYKIEKVLLPKDVFVGSKAPAPAPA<br>APVREKPTKAVPEATVESPVSPVDISSALIHTSLAHCIVIFFIEH                                                                                                                                                               |
| SsuFLA30 | MASCSHWWHAPVYFIASAVLAFIAISTALNSPPSKATRPTRPISNHISLNASRT<br>LRESGFNIMATLLLIAPEMFFSSENTTIFAIDSSSLVNTSIPPWFLKNLLKYHTS<br>PMKLSMEDVFKKPQGSCFPTLVDRKKLAVTKIDAKQRLAEINHVLVSHPD<br>VLERQIAIHGVLAPFSSLRSKDVYLGWESIQAPICDDNSSLVSDATDPGIVLE<br>WTRIIHLLSSHRFVSFAIGLNSVLDRILADHKNLSSVTIFAPPEFDFVASSSPML<br>ERIVRLHILPQRATYKDLAALPDKHRLRLLPDVDLEITNDVNVYTQGLAING<br>VEIAAPEILSSKEFIVHGITQAFKMAKFPNASR                                                             |
| SsuFLA31 | MAALRYSLLSFTLSALVSTVLAHNITDILSGFPEYSEFNKYLTQTKLADEINT<br>RQTITVLALNNGAMSALAAKHPLSVIKNALSLLVLDYFDPTKLHQISKGST<br>LSTTLYQTTGNAPGNLGFVNITDLQGGKVGFSAAPGSKLESSYTKSVKQVP<br>YNISILEISQPIIAPGILTAPAPTPSAGCKTFASLLQTSGVIKMYQSAADKGLTIF<br>APNDEAFKAAGVPDLSKLTNAEVVSLQYHATASYSPPFGLKTSKDPISTLAS<br>NGAGKFDLTVTSAGDSVTLHTGIGPSRVAETVLDSTPLVIFTVDNVLLPVELF<br>GKAPSPAPAEPPVSAPSPSPIASTPAPAAIVEAPSPLAAAPPAPEVETPGGAPADA<br>PFGSENSTADGNAAVHVIVPVQVTVFAAVICSILMS |
| SsuFLA32 | MEFSVLIVLSSALLFACAPLAYAQKVASPPAPTPTPSPAPAPSPFYVNLTL LLSV<br>AGPFQNFNLNyleSTKVIDTFQNQANNTDEGITIFVPKDDAFKNLKNPSLSNLT<br>QDQLKQLILFHALPHFYSLSDFKNLSQVSPISTFAGAGGYALNFTDSSSGTVHL<br>DSGWSKTKVSSSVHATDPVAIYQVDKVLLPEAIFGTDIPPAPAPAPETSPITA<br>DSPITSDDTTGSSPANSLPNSSFRINGVGIWSQLVLGIAGVVVFL                                                                                                                                                               |
| SsuFLA33 | MPRPLPLTLAVSLALLASTATVNAHNITRILAKHPQFSTFNHYLTVTHLAAEI<br>NRRQTITVLALDNAAMSSLLSKQLSVYTLRNVLSLHVLVDYFGTRKLHQITN<br>GTEVTATMFQATGSAPGSSGYVNITDLNGGKVAFGAEDSNGKIDAVYVKSLV<br>EIPYNISVLQISQPLNSAEAEAPTAAPTLNVTAILSKQGCKAFSDLLIASGAHT                                                                                                                                                                                                                      |

|          |                                                                                                                                                                                                                                                                                                                                                                                                                                               |
|----------|-----------------------------------------------------------------------------------------------------------------------------------------------------------------------------------------------------------------------------------------------------------------------------------------------------------------------------------------------------------------------------------------------------------------------------------------------|
|          | TFEENV DGG LTVFCPTDAVINGFMPKYKNLTAPQKVSLLLYHGIPYQSLQML<br>KTSNGLMNTLATNGANKYDFTVQNAGEVVTLETKVTTATITGTVKDEEPLV<br>VYKINKVLLPRELFKAVQKAPAPKGAKVVADGPAADAPSDDESVDQTADNNG<br>VNKIDGGRLAVVALSLFYGVVMFS                                                                                                                                                                                                                                             |
| SsuFLA34 | MKRQISFSFSLVLLFLHCSQTLSPPTAPAKAPAAATAPPLAATSAQASPPV<br>MVPVQVSKGPVNVIKILQKAGHFAILTRLIKSTQEDIQLFSQLNDSRDGVTIFA<br>PTDGAFSAIIKSGVLNSLTDHQKIELVQFHIPRVLSTANFQTVSNPITTLAGSG<br>SRFTLDVITTESMVNVTTGLTNTSVSAIVYTDSQLAIYQVDKVLLPLDIFAPK<br>PLAPAPAPQPKKDDGEESPMIPEDTSGSVTCMVHNTLFMFGVGIVAAAIPL                                                                                                                                                       |
| SsuFLA35 | MVPQFLFSASFILFLLYCPTILAQSPAAAPAPAGPTNVTKVLEKGGQFSVFIR<br>LLKATQEDVTLNGQLNNTNNAITIFAPSDSAFSSLKSGTLNSLNDQEKAELVQ<br>FHIIPQFLSSSQFQTVSNPLTTQAGSGGRLELNVTTTGNSVNITTGLTNTSVSG<br>TIYTDNQLAVYQVDKVLLPLDIFTPKPPTPAPAPEKTKKRSKAAAPESEADA<br>SGAVSFAVLNNVFFGVCMVAIYSL                                                                                                                                                                                  |
| SsuFLA36 | MSLRFSPVFALCFSLLFFNTARAFNITQILSQYSDFKTFSSYLTETQLAGEINS<br>RQTITVLVVEDGNMSPLSGKPKDEIKNVLSGHVILDYYDVAKLQKLQNKTA<br>MLTTLFQSSGQAVGQQGFLNVTVLSTNSVAFGSAAPGSSLSSNLVKS SVSSQP<br>YNISVLQVSNIIVPAGTGKTNSTTSPVTIGSPKTSPSPASPEKPPSSSNPPPSK<br>APAPSTAKPPPTNAPAPSMVKPPAANAPSATPEAMSTSPVEGPSPATADGPSA<br>DSPITLSPAMDGPVAAAPAADGPLADAPSDPKSDASVINPGNNLASFAPILL<br>AFALA                                                                                   |
| SsuFLA37 | MATVLLFFLILLISSSVLAASFNSNALEILSASGYLSMALTLQITSKRLNLES<br>SAATIFAPLDIAFARVGQLSALDLQYHISPLRLSGDYLSLSPFGAKIPTLLPNHS<br>LTVTSLGYFDGKLSINGISIEESALVDFGSLIIFGMGEFFSSSLEISPNITPAPSP<br>SPVTSLGDTSQNEPSGMDADYLGQASHLLITIFAPLDQAMEEYAKNASDYS<br>SIFRHHVVPGLFPRQDLEGFNDGTSPLTFFRGFMINLTRSGDVLVLNGVPLIFP<br>DMYQSGWLVIHGLNQLLMPPMKEIVGESFSELDGGEDKPDVLD FDEYVYGSP                                                                                        |
| SsuFLA38 | MDSKVSSLLFIAILFLLSSTSTAFNITKILAQYPEFASFNDLLAQSGLAQEINGR<br>ETITVLALDNGSIDGLSGRPVDIAKRILSAHVILDYYDQIKLSKLQKASTIVTT<br>LFQASGIADDRQGFLNVSKTAEGIKFGSAMKGAPLVASLVKSVYAQPYNISV<br>LQVSEPIEAPGIENMAPPPAAVPKKAPAPAAKTPSKAPAPSKVEPSTPAESP<br>TEGPVAADVPAASPLADAPLADEVPAKAASSQM HVGGAVVVVGLLACMVG<br>F                                                                                                                                                 |
| SsuFLA39 | MAPINPAISHITPTTTLTYFILLLLTTTTTTTPILAITNLTALLSSFPDFSSFTSLIA<br>STPSLTSDLSDRSALTLLVIPNSYLSSSLDLTRRLSPSALADLLRYHILLQYLSF<br>SDLHQVPPSGTLITTLFQTTGRASSNSGSVNTLPYNVSIISVNSLLVPYGF DLM<br>ASET RPTLGLNITKELLDGHNFFVAASLLSASGVVQEFEADEGGAGITLFVPT<br>DSAFSDL SATAISLQSLPADKKADV LKFHVLHSYYPLGSLESIVNPVQPTLAT<br>EDMGAGSFTLNISRVNGSVAIDSGIVQASVTQTVFDQNPVVIFGVSKVLLPKE<br>IFGRNPVLTSPKPSDMGNAQPPVSVLSPETSPKMLSSAPGVREEIKSGVGGL<br>QWLSTLPLL FVVFVCNCI |
| SsuFLA40 | MSPQDL MINKSTSKILLHLLLSLLHQITTAALTDQQLEFALLSLRSHGYTLFP<br>NAISTDLRFHLLNQTN NATSTFTLFSPPDSLLFSVDLSSTASHYTKSLFLHVS                                                                                                                                                                                                                                                                                                                              |



|          |                                                                                                                                                                                                                                                                                                                                                                                                                              |
|----------|------------------------------------------------------------------------------------------------------------------------------------------------------------------------------------------------------------------------------------------------------------------------------------------------------------------------------------------------------------------------------------------------------------------------------|
|          | <p>PSRLSMSDFRNLTAAASGGTYIDSLVPNHRLLINNSQARLNGTVDGSVLVNRV<br/> RVSVPDFLFGSDIAVHGLDGILVAGFDDKVEDTSFEAATS<span>SP</span>ANEIWSAELN<span>SP</span><br/> PAVRFPARKRNGKNRRRNGKNRRRNGRNGGITRSNHRGRRIHDGFGRRGGGR<br/> NIGGGTRGDGTHGAFSKYNNRL</p>                                                                                                                                                                                     |
| SsuFLA41 | <p>METFTLLVLLMKVLVCAT<span>SP</span>TGIPSKSQDLVVATNEMARAN<span>YFSFVLLINMS</span><br/> PLDQRLQENVTFMLPKDRMLSKIRMHQNAVSGFLLRHSIPSPLLFDHLQHIPP<br/> GSLIPSSDPDYMLNISNKGRKNFSLNNVRITSPNLC TAGSSIRCHGIDGVL FVA<br/> TDRPHLPACSNSS<span>SP</span>AV<span>AP</span>PLPSDIPSPF<span>SP</span>APAGAA<span>AP</span>TDQEH<span>SP</span>KHSGSSH<br/> LESPSPGGLLK FVATSILVLNVWVL</p>                                                   |
| SsuFLA42 | <p>MATSPLSLILSLFLSLHAQAQ<span>AP</span>A<span>AP</span>ASSGPVNFTAVLEKGG<span>QFVTFM</span><br/> RLLNKTQTFNQIENQLNSSSEGMTIFAPTDNAFN NLKAGALNGLSQQQVQ<br/> LLQYHMLSKFYSLSNLLVSNPVSTQASGHEGVWGLNFTGQSNQVNVSTGL<br/> VEVQINNPLRQDFPLAVYPIDKVLLPEELFGVNRTIA<span>SP</span>PPATSSGKSNSSETA<br/> AAEP<span>SP</span>GKNSAGGRNVALGSIVGLGLVCMGIIS</p>                                                                                 |
| SsuFLA43 | <p>MKPQYFLSSFSIFLLFLHCTNTFAQ<span>SP</span>AA<span>AP</span>AQPPAVVA<span>SP</span>AA<span>TP</span>TQAA<span>AP</span>HG<br/> ITNVTKILEKAGHFTIFIRLLRSTQEENHLFSALNDSSTGLTIFAPTDSAFSELK<br/> SGTLNLTSDGDKSELVKFHVVPFTLSTSQFQTVSNPLGTWAGTGNRLPLNVT<br/> SYPNSVNITTGLTNTSLSGAVYTDNQ LAIYKIEKVLLPKDIF<span>AP</span>N<span>AP</span>APAPVKP<br/> <span>AP</span>EKPAKEVPEVTAE<span>SP</span>AASVDISSARIFTRNLVVG SAGLLASAMFSL</p> |
| SsuFLA44 | <p>MKQQLISSFSMIFLFLHCANTFAQIPAA<span>AP</span>AQ<span>AP</span>AVVVA<span>SP</span>AA<span>TP</span>TQAA<span>AP</span>H<br/> GITNVTKILEKAGHFTIFIRLLRSTQEENHLFSALNDSSTGLTIFAPTDSAFSEL<br/> KSGTLNLTSDGDKSELVKFHVVPFTLSTSQFQTVSNPLGTWAGTGNRLPLNV<br/> TSYPNSVNITTGLTNTSLSGAVYTDNQ LAIYKIEKVLLPKDIFASN<span>AP</span>APAPVA<br/> <span>PA</span>EKPAKAVPAATVE<span>SP</span>AASVDISSALIFTHNLVVG SAGLLASAIFSL</p>               |
| SsuFLA45 | <p>MKPQYFLSSFSIFLLFLHCTNTFAQ<span>SP</span>AA<span>AP</span>AQPPAVVA<span>SP</span>AA<span>TP</span>TQAA<span>AP</span>HG<br/> ITNVTKILEKAGHFTIFIRLLRSTQEENHLFSALNDSSTGLTIFAPTDSAFSELK<br/> SGTLNLTSDGDKSELVKFHVVPFTLSTSQFQTVSNPLGTWAGTGNRLPLNVT<br/> SYPNSVNITTGLTNTSLSGAVYTDNQ LAIYKIEKVLLPKDIF<span>AP</span>N<span>AP</span>APAPVKP<br/> <span>AP</span>EKPAKEVPEVTAE<span>SP</span>AASVDISSARIFTRNLVVG SAGLLASAMFSL</p> |
| SsuFLA46 | <p>MDRLQHLLISLYLLILFINLTKTTAQ<span>SP</span>APAPAPP GPTNVIKILKKAGHFKNFIR<br/> LLKSTQLDSNLNSQLGNTNNGLTIFAPSDTAFSVLKTGTLP SLTDQEKLELMQ<br/> FHIVPMFISSSQFETVSSPLKTHAGSGARTHQH HYFDTVYMDTNLAIYQVDK<br/> VLLPLDIF<span>TP</span>K<span>PA</span>PAPAPELKAESE<span>SP</span>DDAVSKKDISSGVSFAMLRD TVLFIAA<br/> TVAAISFSL</p>                                                                                                       |

Green: Signal peptide; Red: AGP-like glycosylated regions;  
Yellow: Fasciclin domain; Gray: GPI-anchor protein;
